# Supplementary material
Source: PubMed Central journal article supplement (PMC3099679)

## Supplementary Figures

**Fig. S1 Chemical synthesis of (Bdp-So and (S)-FTY720 regioisomer.** (A) Synthetic schemes used to prepare the (S)-FTY720 regioisomer. (B) Synthetic scheme for the synthesis of Bdp-So.

**Fig. S2 Inhibitor-kinetic analysis for stably expressed SK1 in HEK 293 cells.** Dixon,  $S/V$  versus  $S$  and  $1/V$  versus  $1/S$  plots for  $K_i$  determinations for (A) FTY720, (B) (S)-FTY720 vinylphosphonate, (C) SKI. Results are representative of three independent experiments.

### Supplementary Information

To prepare the (S)-FTY720 regioisomer, the positions of the amino group and one of the prochiral hydroxymethyl groups of FTY720 were interchanged as follows. Epoxide (R)-**2** was prepared by Sharpless asymmetric epoxidation of allyl alcohol **1** as previously described (1). Regioselective opening of 2,3-epoxy alcohol (R)-**2** with sodium azide in the presence of ammonium chloride in aqueous MeOH at reflux gave azido diol (S)-**3** as the only product in 93% yield. The azido group was reduced to an amino group with Pearlman's catalyst to give the desired (S)-FTY720 regioisomer in 92% yield (Suppl. Fig. 1A). The intermediates and products were characterized by  $^1\text{H}$ - and  $^{13}\text{C}$ -NMR spectroscopy and high-resolution mass spectrometry with electrospray ionization.

The preparation of Bdp-So is outlined in Suppl Fig. 1B. An *E*-selective olefin cross-metathesis reaction of (S)-Garner allylic alcohol **5**, which was prepared by *p*-toluenesulfonic acid mediated opening of **4**, with intermediate **6** (2) provided *N*-Boc-Bodipy-sphingosine derivative **7**. Deprotection of **7** using  $\text{BF}_3\cdot\text{OEt}_2$  in the presence of 4 Å molecular sieves afforded Bdp-So (**3**, **4**).

1. Lu, X., Sun, C., Valentine, W.J., E.S. Liu, J., Tigyi, G. & Bittman, R. (2009) *J. Org. Chem.* **74**:3192-3195.
2. Peters, C., Billich, A., Ghobrial, M., Högenauer, K., Ullrich, T. & Nussbaumer, P. (2007) *J. Org. Chem.* **72**:1842-1845.
3. Li, Z. & Bittman, R. (2007) *J. Org. Chem.* **72**:8376-8382.
4. Bode, C., Sensken, S.-C., Peest, U., Beutel, G., Thol, F., Levkau, B., Li, Z., Bittman, R., Huang, T., Tölle, M., van der Giet, M. & Gräler, M.H. (2010) *J. Cell. Biochem.* **109**:1232-1243.

**(2S)-2-(Aminomethyl)-4-(4'-*n*-octylphenyl)butane-1,2-diol [(S)-FTY720 regioisomer].**  $[\alpha]_D^{25} +1.0^\circ$  (*c* 1.84,  $\text{CHCl}_3$ );  $^1\text{H}$  NMR ( $\text{CDCl}_3$ )  $\delta$  0.88 (t, 3H,  $J = 6.8$  Hz), 1.26-1.38 (m, 10H), 1.58 (m, 2H), 1.70 (m, 2H), 2.55 (t, 2H,  $J = 7.6$  Hz), 2.64 (m, 2H), 2.96 (s, 2H), 3.64 (m, 2H), 3.71 (br s, 4H), 7.09 (s, 4H);  $^{13}\text{C}$  NMR ( $\text{CDCl}_3$ )  $\delta$  14.1, 22.7, 29.0, 29.3, 29.4, 29.5, 31.6, 31.9, 35.6, 38.3, 48.0, 68.5, 72.3, 128.1, 128.4, 139.1, 140.5. HRMS ( $\text{M}+\text{Na}^+$ )  $m/z$  calcd for  $\text{C}_{19}\text{H}_{33}\text{NO}_2\text{Na}^+$  330.2403, found 330.2407.

**Bdp-So.** ESI-HRMS ( $\text{M}+\text{H}^+$ )  $m/z$  calculated for  $\text{C}_{26}\text{H}_{41}\text{BF}_2\text{N}_3\text{O}_2^+$  476.3254, found 476.3250.

# Suppl Fig. 1A

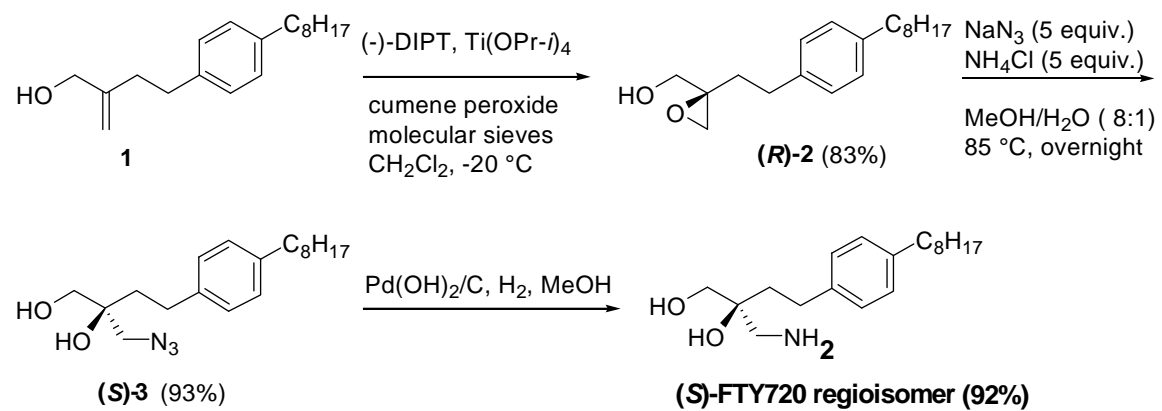

# Suppl Fig. 1B

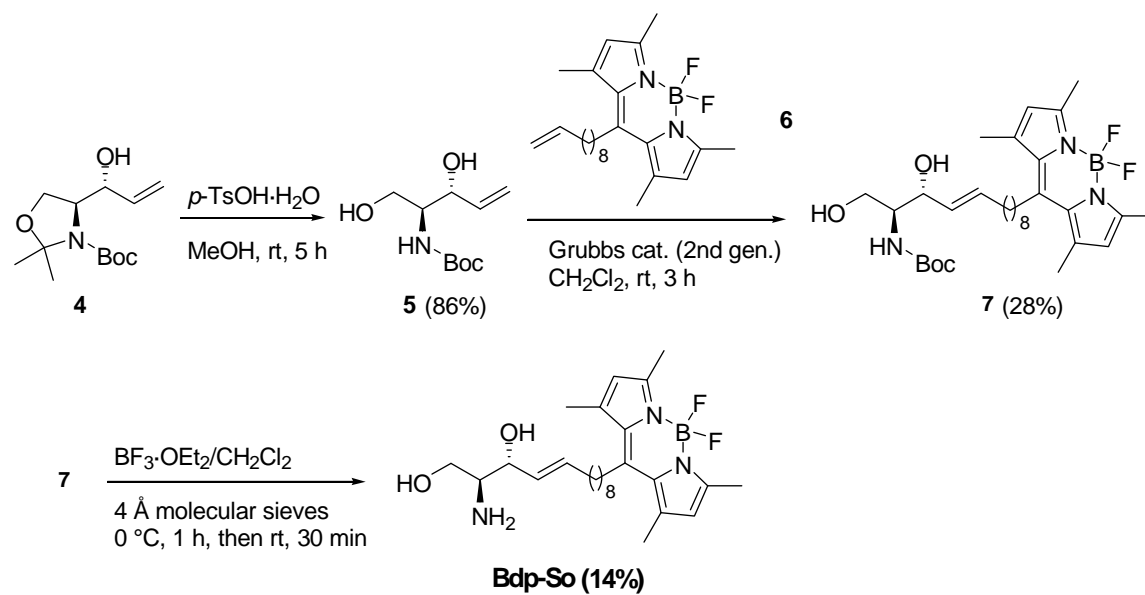

Suppl Fig. 2A

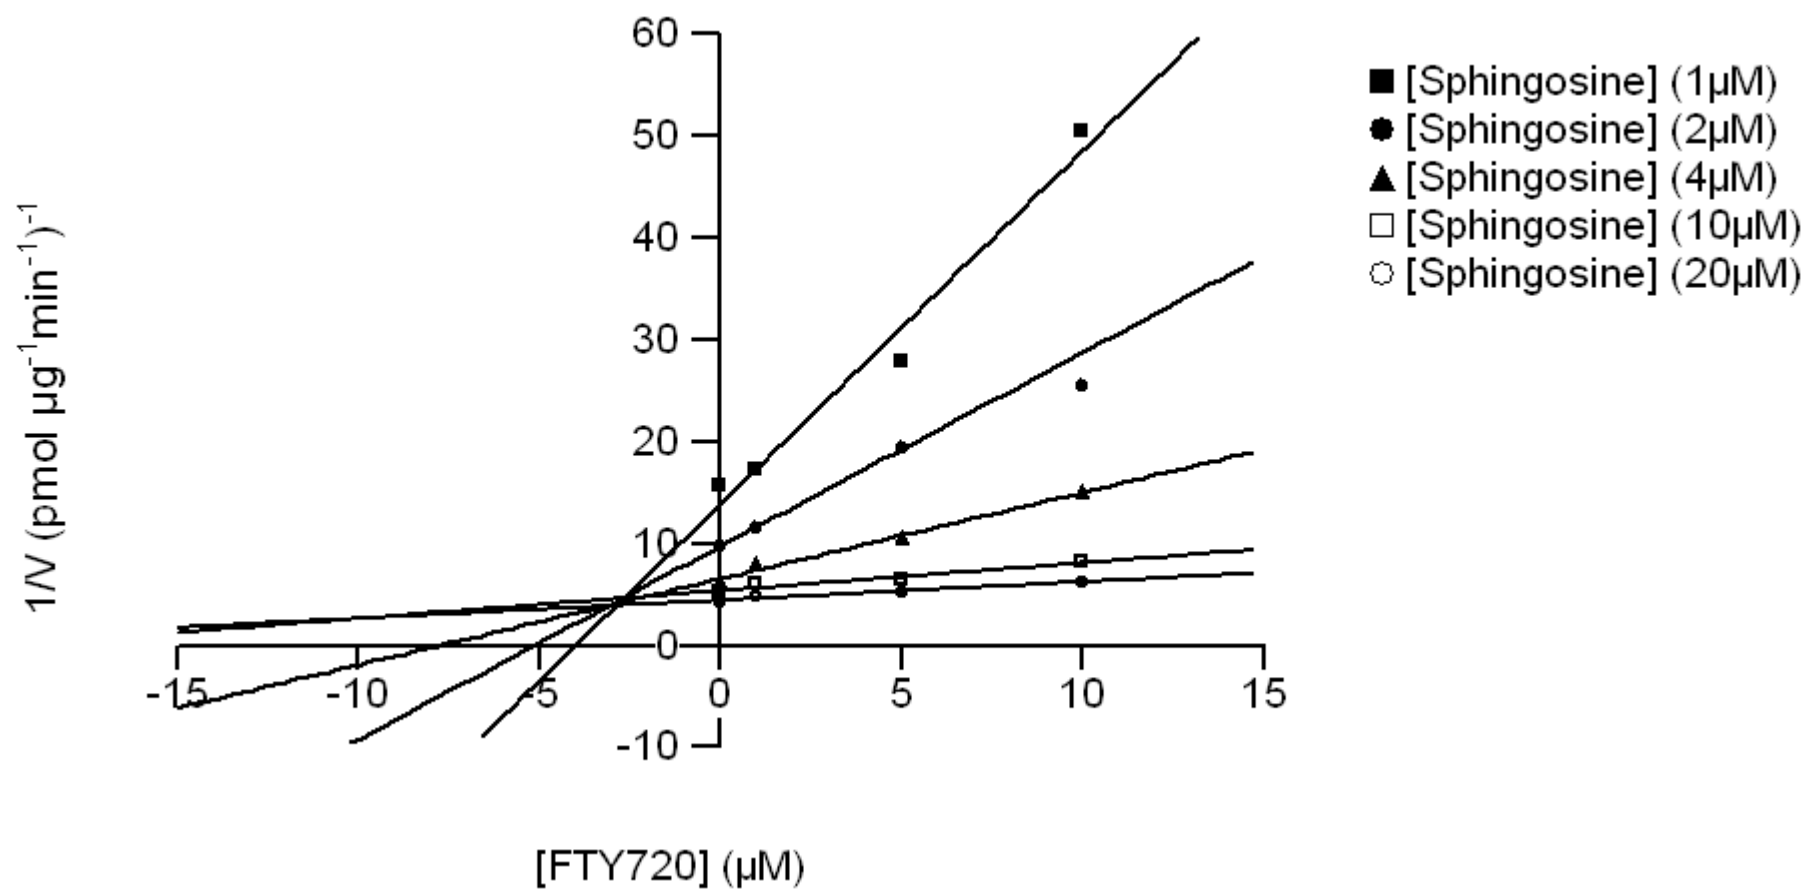

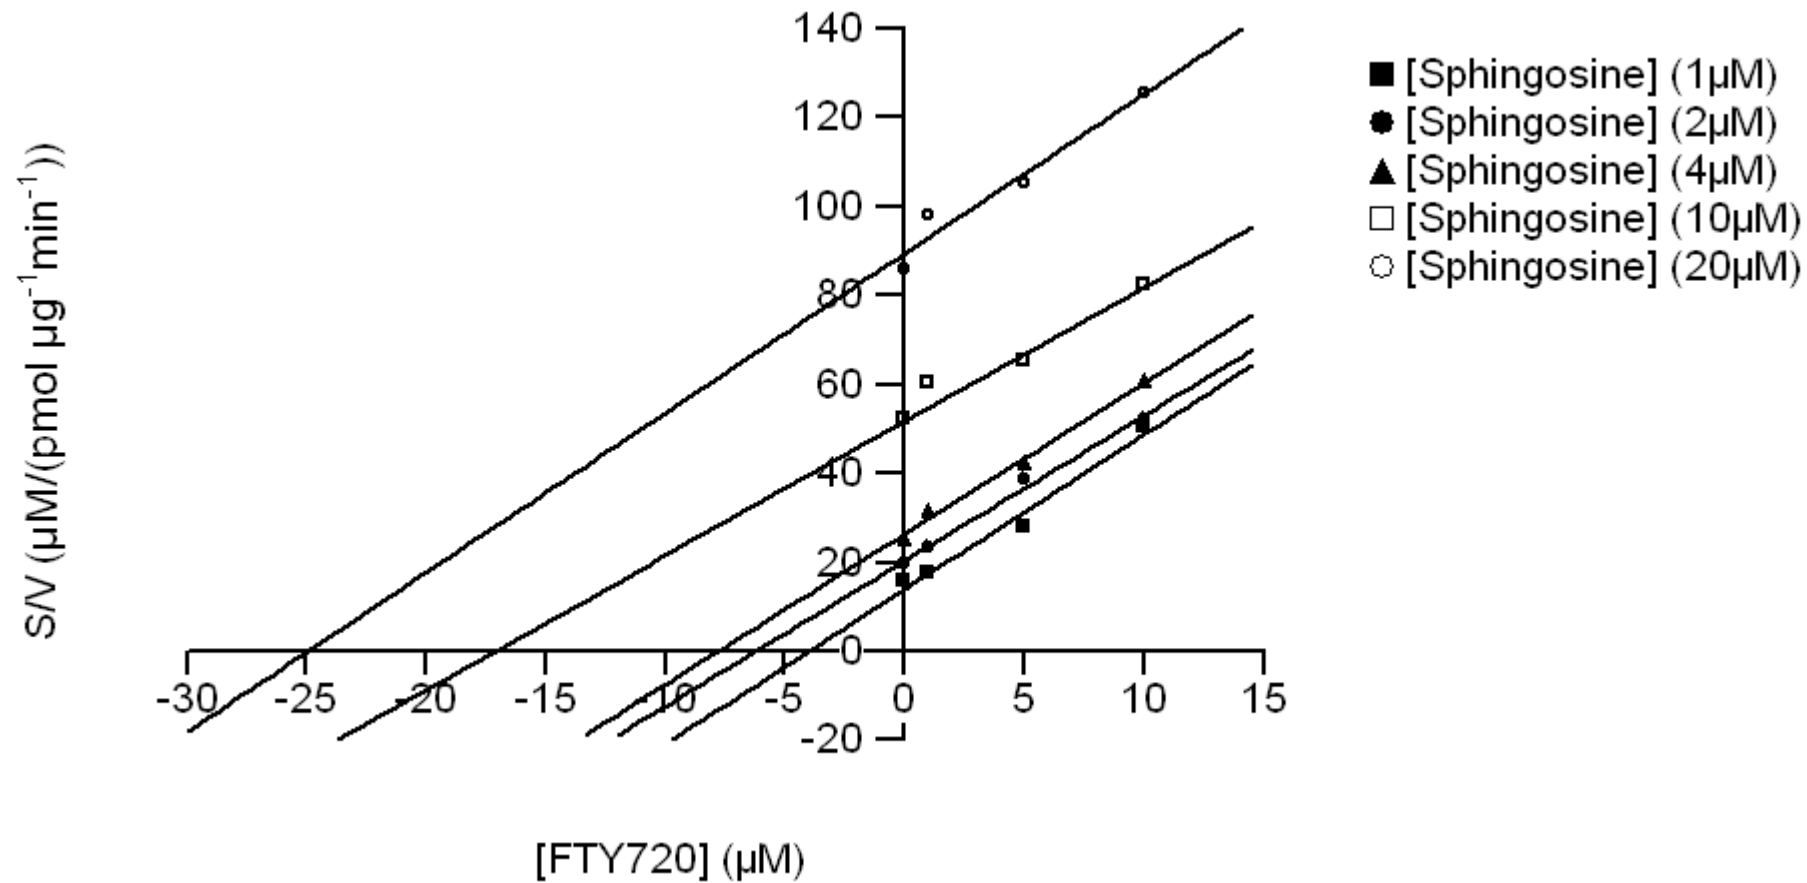

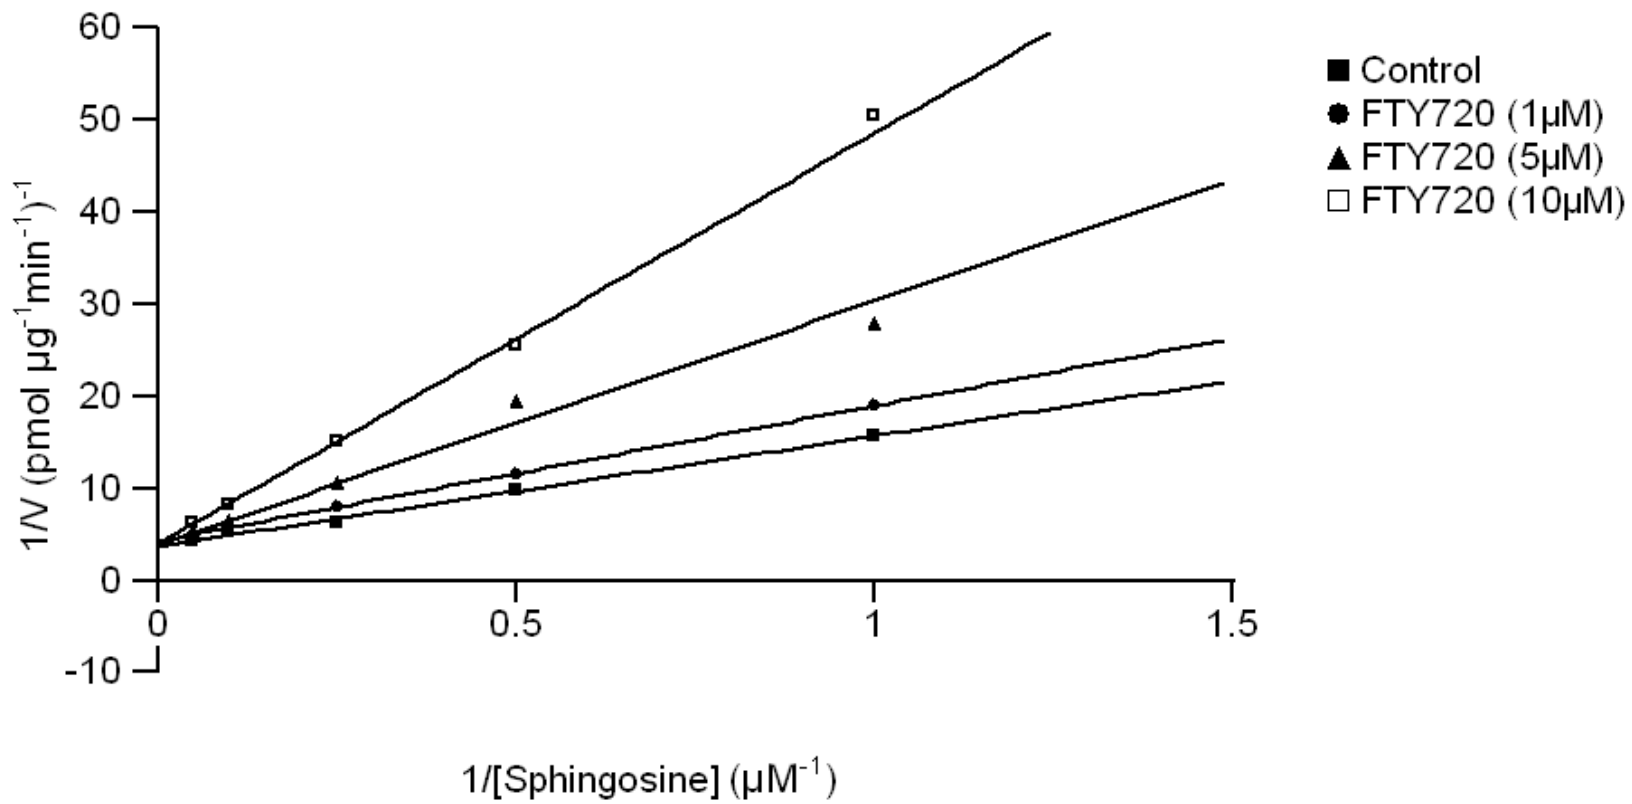

Suppl Fig. 2B

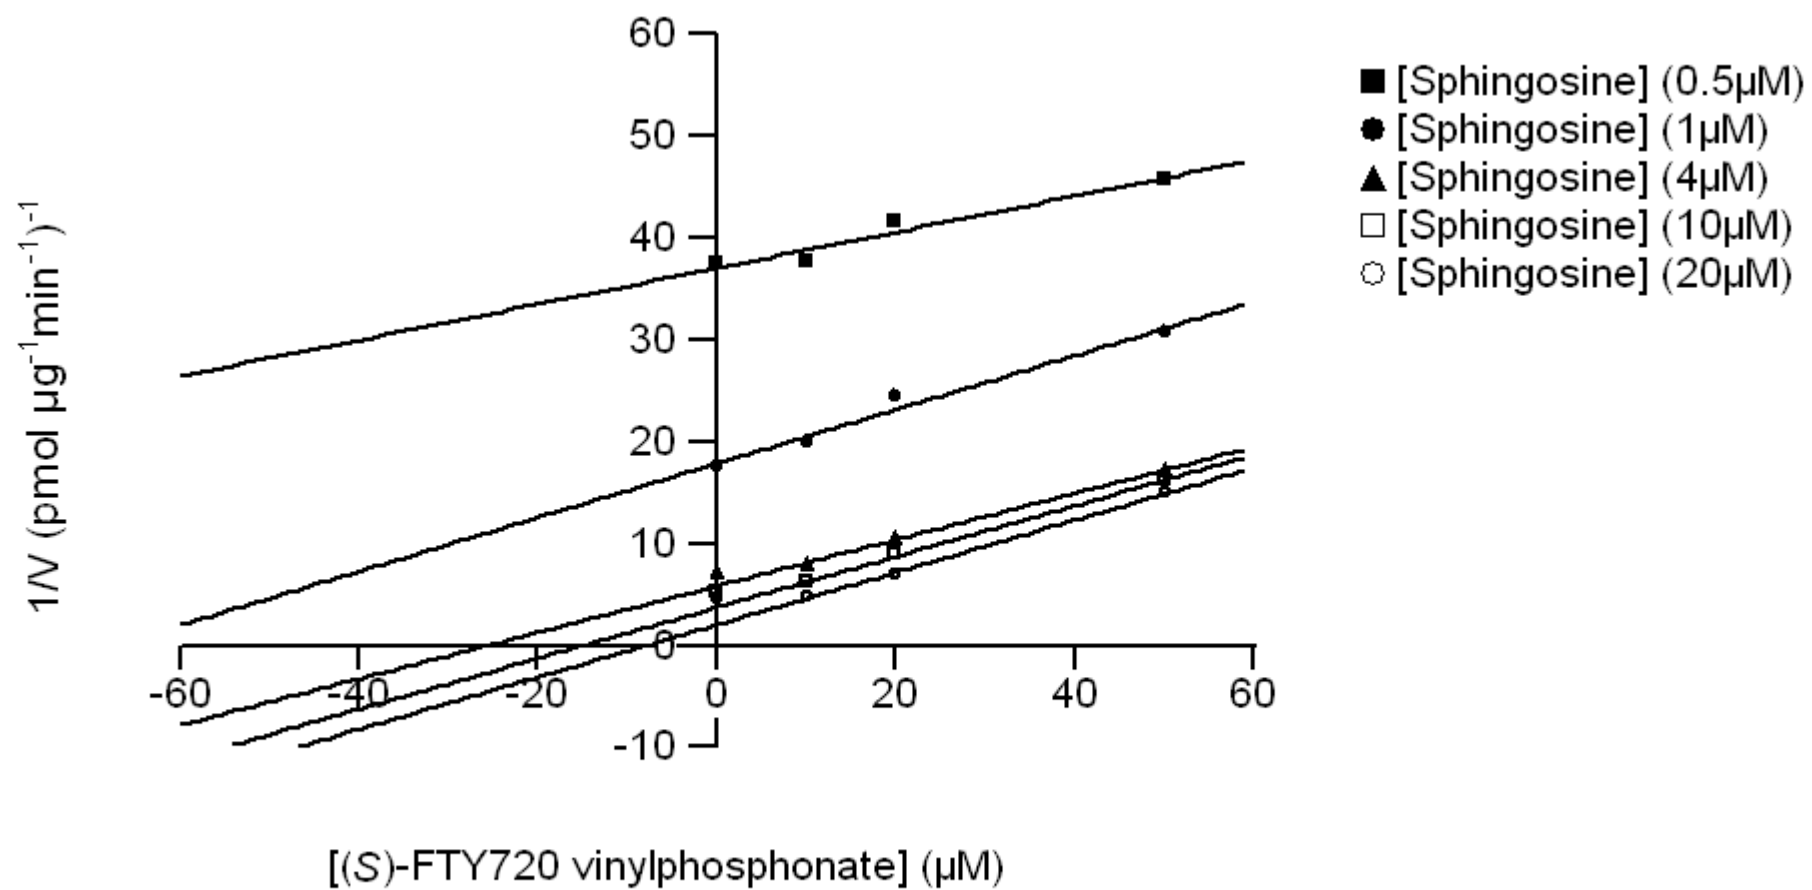

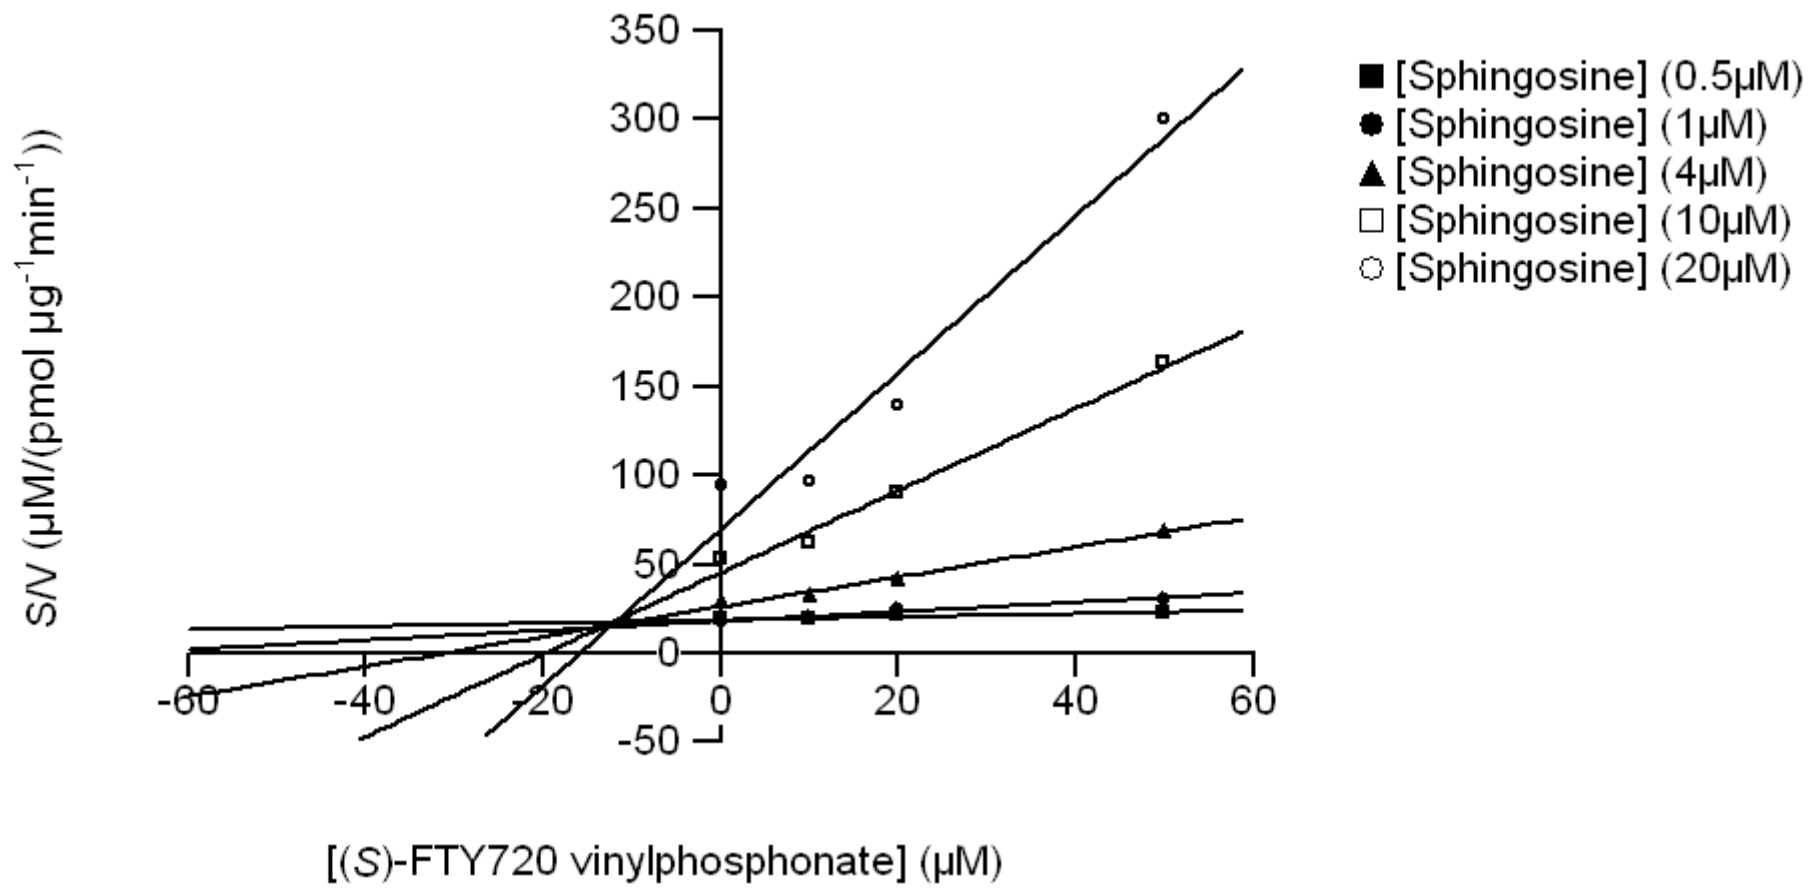



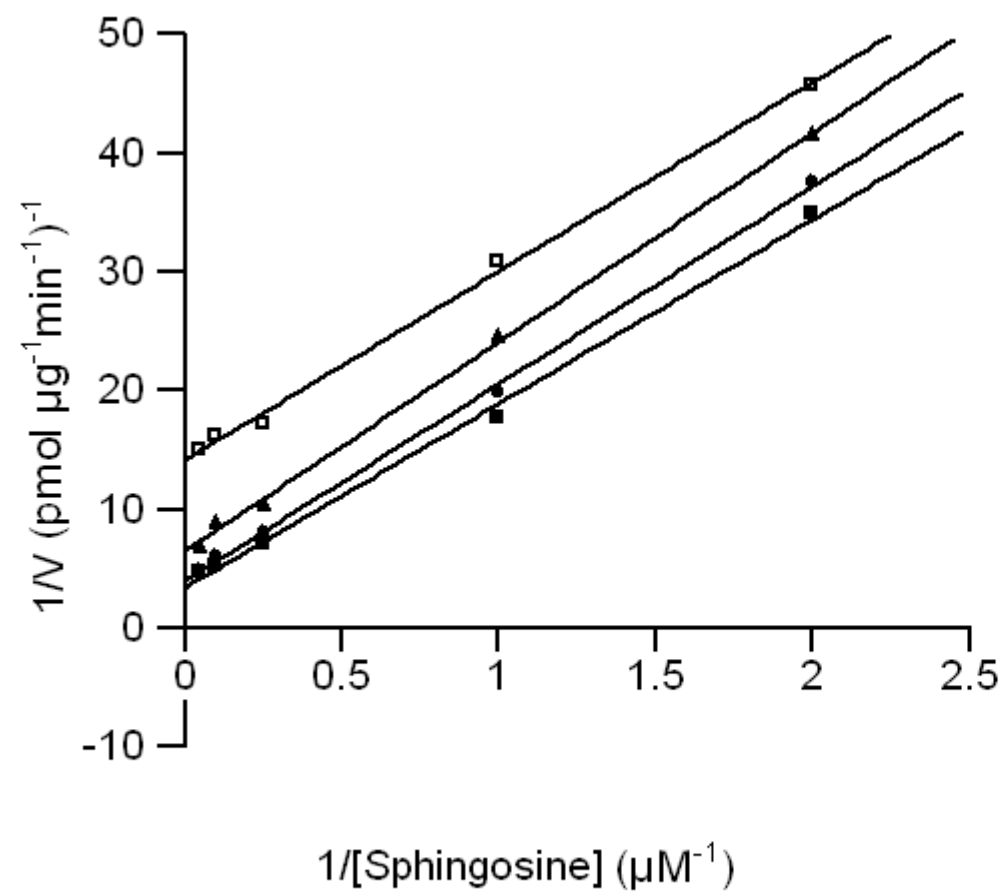

- Control
- (S)-FTY720 vinylphosphonate (10 $\mu\text{M}$ )
- ▲ (S)-FTY720 vinylphosphonate (20 $\mu\text{M}$ )
- (S)-FTY720 vinylphosphonate (50 $\mu\text{M}$ )

Suppl Fig. 2C

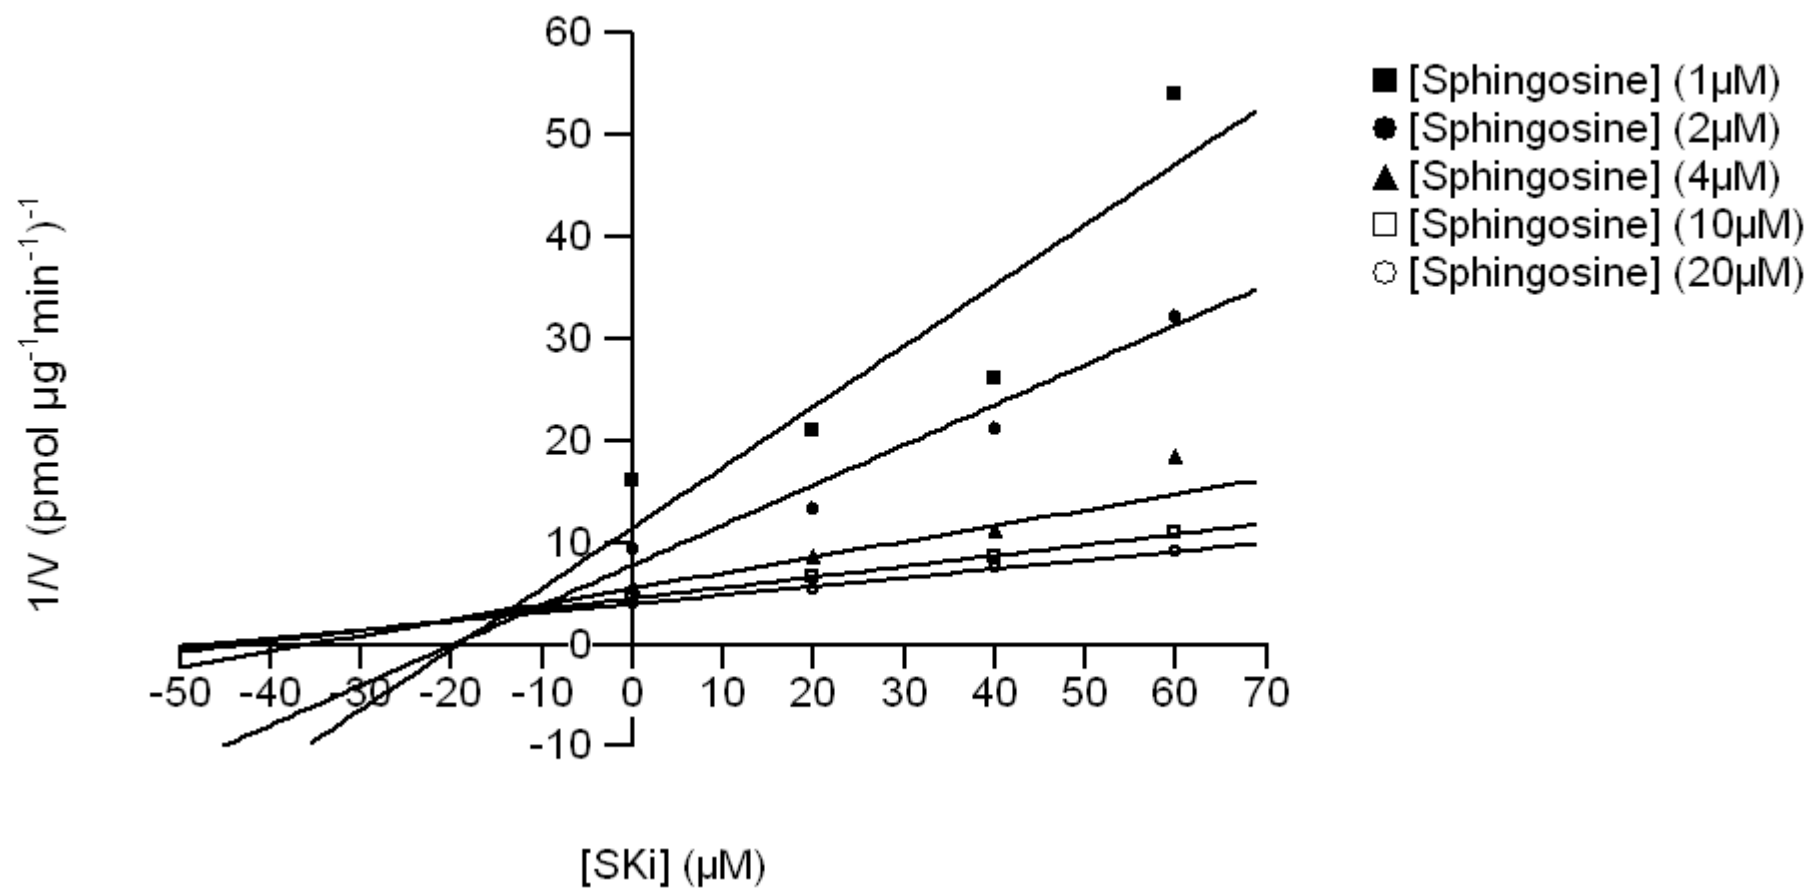

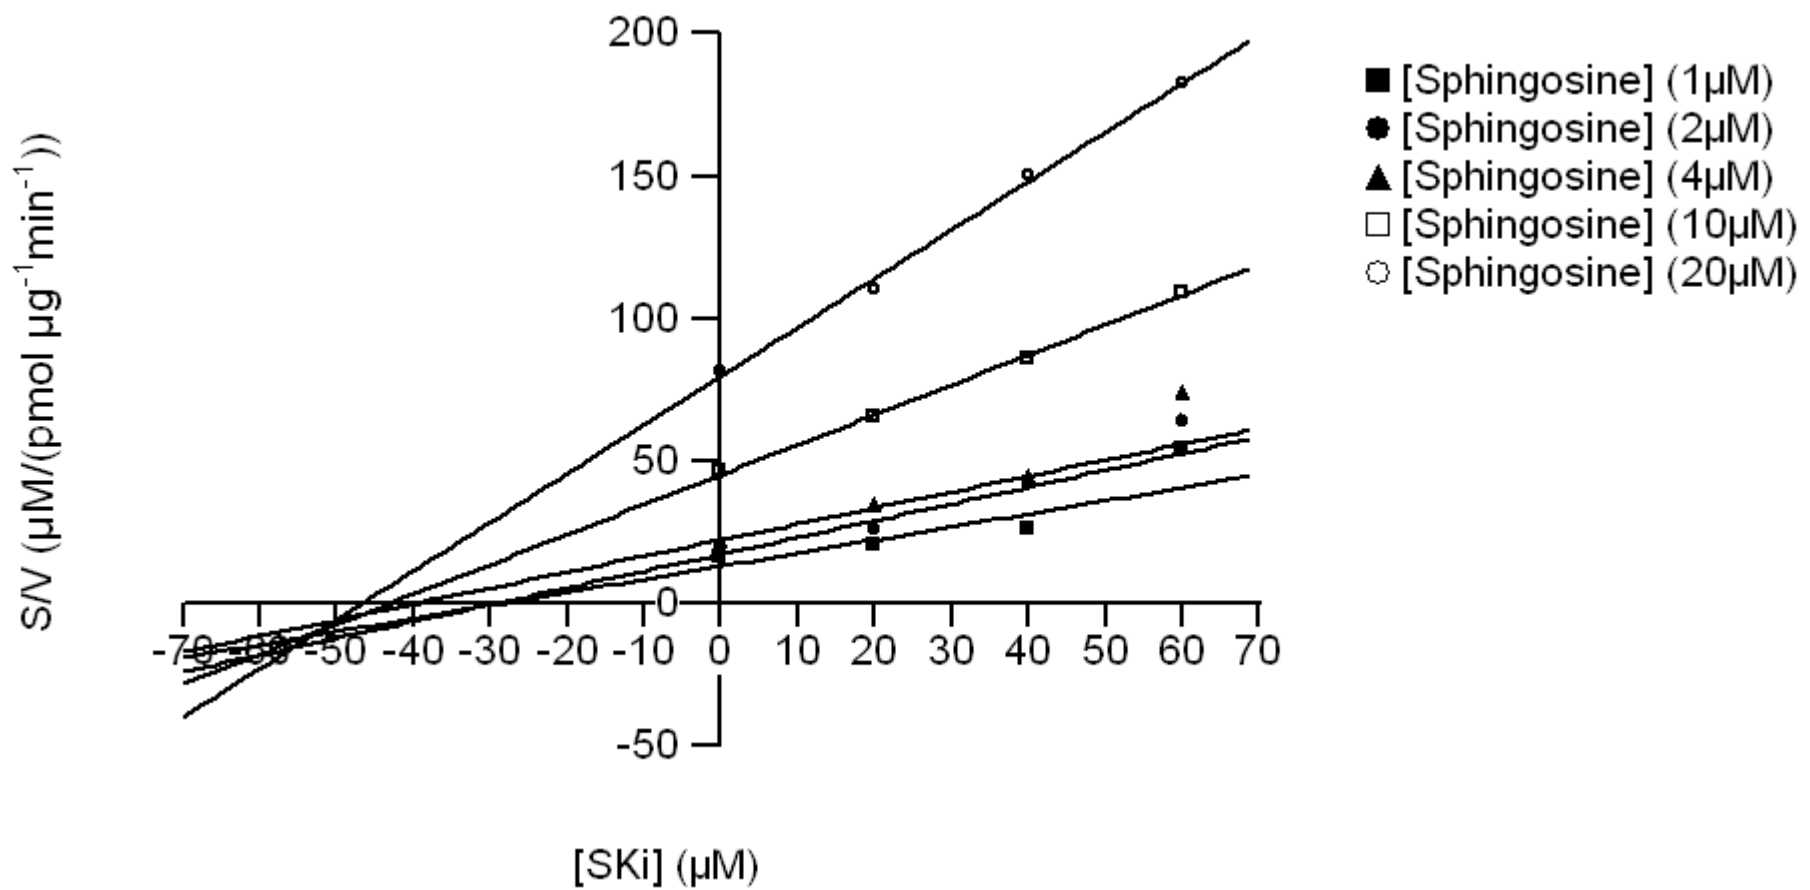

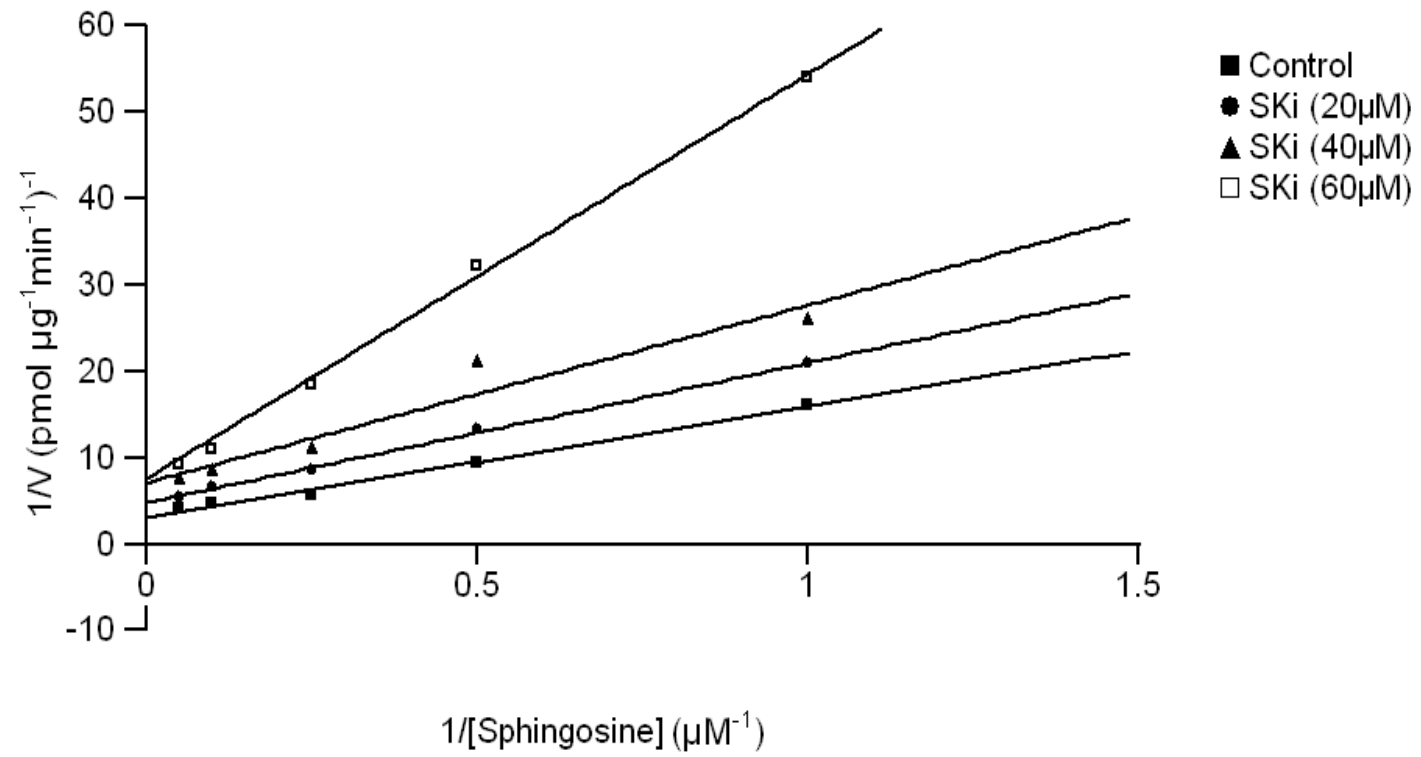

Supplement: supp_M111.220756_jbc.M111.220756-1.pdf [file supp_M111.220756_jbc.M111.220756-1.pdf]
